# Supplementary material
Source: publisher site journal article supplement (https://www.spandidos-publications.com/6616/downloadSupplementary)
Supplement: Supplementary file 1 [file downloadSupplementary]

## Sheet: Sheet1
Table SI. Clinical data for all patients with thyroid cancer obtained from the The Cancer Genome Atlas database.
Samples	Pathologic T Stage	Pathologic N stage	Pathologic stage	Extrathyroidal extension	PFI event	OS time	OS event	FN1 expression
TCGA-J8-A3YE-01A	T3	N1	I	Yes	No	847	0	9.13601
TCGA-BJ-A28W-01A	T2	N0	I	-	No	344	0	3.41779
TCGA-EL-A4K9-01A	T2	N0	II	Yes	No	1455	0	9.28814
TCGA-EM-A1YB-01A	T2	-	II	No	Yes	592	0	6.61089
TCGA-DJ-A4V0-01A	T2	N0	I	No	No	1081	0	5.47942
TCGA-EL-A3T2-01A	T2	N1	III	No	Yes	988	0	5.00017
TCGA-EM-A4FU-01A	T3	-	I	No	No	1840	0	4.64106
TCGA-FK-A3S3-01A	T3	N1	I	Yes	No	2162	0	6.76891
TCGA-BJ-A3PU-01A	T3	N1	III	Yes	Yes	567	0	10.1838
TCGA-FE-A23A-01A	T2	N0	I	No	No	2489	0	9.88789
TCGA-FY-A3ON-01A	T2	N1	I	No	No	595	0	8.87776
TCGA-E8-A44K-01A	T1	N0	I	No	No	943	0	9.76535
TCGA-FE-A3PD-01A	T2	N0	I	No	No	2396	0	7.94947
TCGA-FY-A4B3-01A	T3	N1	III	Yes	No	427	0	10.5478
TCGA-BJ-A28T-01A	T1	N1	I	-	No	1081	0	8.2326
TCGA-EL-A3ZP-01A	T4	N1	I	Yes	No	1992	0	9.08561
TCGA-DJ-A1QE-01A	T3	N0	III	Yes	No	4134	0	11.1414
TCGA-EL-A3CS-01A	T4	N0	IV	Yes	No	-	1	10.0976
TCGA-KS-A4I9-01A	T1	N0	I	No	No	2658	0	9.95137
TCGA-EM-A3AI-01A	T2	-	II	No	No	685	0	3.69869
TCGA-DJ-A3UK-01A	T1	N0	I	No	No	1123	0	8.32184
TCGA-EL-A3GO-01A	T2	N0	I	No	No	1973	0	4.86815
TCGA-E3-A3E2-01A	T1	N1	I	No	No	1922	0	8.00432
TCGA-BJ-A192-01A	T3	-	III	Yes	No	1349	0	4.75063
TCGA-EL-A3T6-01A	T3	N0	I	No	No	2988	0	10.289
TCGA-IM-A41Y-01A	T3	N1	I	Yes	No	664	0	9.70824
TCGA-EL-A3T7-01A	T2	N0	II	Yes	No	1256	0	11.0003
TCGA-EL-A3ZS-01A	T1	N1	I	No	No	215	0	9.05959
TCGA-J8-A3YG-01A	T2	N1	III	No	No	678	0	10.395
TCGA-BJ-A2N8-01A	T1	N0	I	-	Yes	504	0	6.02081
TCGA-DJ-A2Q9-01A	T1	N1	III	No	No	1092	0	13.1428
TCGA-EL-A3CV-01A	T3	N1	I	Yes	No	1154	0	11.5524
TCGA-DJ-A3UW-01A	T1	N0	I	No	No	1812	0	10.8442
TCGA-DJ-A1QL-01A	T2	N0	II	No	No	535	0	4.24372
TCGA-EL-A3D0-01A	T4	N1	III	Yes	No	4254	0	9.88789
TCGA-EM-A22P-01A	T1	N1	IV	No	No	1256	0	8.80067
TCGA-FE-A3PB-01A	T3	N1	I	Yes	No	2590	0	9.48531
TCGA-E8-A418-01A	T4	N0	IV	Yes	No	92	0	9.56783
TCGA-L6-A4EQ-01A	T2	N1	III	No	No	1228	0	9.88789
TCGA-E3-A3DZ-01A	T3	N0	III	No	No	1436	0	3.99255
TCGA-ET-A40T-01A	T2	N1	I	No	No	1140	0	9.76535
TCGA-EL-A3H2-01A	T2	N0	II	No	No	-	1	1.99873
TCGA-DJ-A3UV-01A	T1	N0	I	No	No	1466	0	8.1955
TCGA-EL-A3CY-01A	-	N1	I	No	No	127	0	9.56783
TCGA-ET-A39P-01A	T3	N0	III	Yes	No	2900	0	9.16762
TCGA-DJ-A4UW-01A	T1	N1	I	No	No	819	0	9.08561
TCGA-EM-A22I-01A	T3	N0	III	Yes	No	448	0	10.6936
TCGA-FE-A233-01A	T2	-	I	No	No	751	0	11.4181
TCGA-EL-A4K6-01A	T4	N1	IV	Yes	No	1343	0	2.61679
TCGA-DJ-A2PS-01A	T3	N1	I	Yes	Yes	797	0	9.28814
TCGA-DJ-A4UL-01A	T1	N0	I	No	No	939	0	8.70589
TCGA-EM-A3SX-01A	T3	N1	I	No	No	908	0	8.38746
TCGA-DJ-A13M-01A	T1	N0	I	No	No	1484	0	2.90755
TCGA-J8-A3O1-01A	T3	N1	I	No	No	827	0	9.76535
TCGA-EL-A3D5-01A	T3	N1	I	Yes	No	1737	0	4.02911
TCGA-BJ-A290-01A	T3	N1	III	Yes	No	919	0	9.23729
TCGA-BJ-A0ZF-01A	T2	N0	II	No	Yes	1217	0	4.09041
TCGA-FY-A3R7-01A	T3	N1	III	Yes	No	495	0	8.2882
TCGA-KS-A4I1-01A	T2	N0	I	No	No	812	0	7.42809
TCGA-ET-A39M-01A	T2	-	I	No	No	2582	0	8.05164
TCGA-BJ-A190-01A	T2	N0	II	No	Yes	626	0	3.49102
TCGA-E8-A413-01A	T1	N0	I	No	No	912	0	9.95137
TCGA-CE-A481-01A	T1	N0	I	No	No	346	0	7.27196
TCGA-DJ-A4UR-01A	T3	N1	II	Yes	No	1058	0	5.04378
TCGA-EM-A22M-01A	T1	N0	I	No	No	442	0	8.90523
TCGA-DJ-A3V8-01A	T3	N1	I	Yes	No	647	0	9.48531
TCGA-EM-A1CU-01A	T3	N1	I	No	No	636	0	9.70824
TCGA-DJ-A3V2-01A	T2	N1	I	No	No	615	0	8.87776
TCGA-FE-A230-01A	T3	N1	I	No	No	2173	0	11.4181
TCGA-DJ-A3VE-01A	T1	N0	I	No	No	577	0	9.88789
TCGA-ET-A3BV-01A	T2	N1	III	No	No	2294	0	11.5524
TCGA-DE-A0Y3-01B	T4	N1	IV	-	Yes	1526	0	10.6936
TCGA-EL-A3CX-01A	T2	N0	I	No	No	3243	0	5.14274
TCGA-IM-A3U2-01A	T3	N1	IV	Yes	No	190	0	10.395
TCGA-EM-A4FR-01A	T3	N1	I	No	No	655	0	3.97357
TCGA-EM-A1YA-01A	T2	-	II	No	No	602	0	5.00798
TCGA-DJ-A2Q0-01A	T2	N0	II	No	No	1045	0	5.5023
TCGA-DJ-A2Q2-01A	T3	N0	III	No	Yes	1337	0	5.58054
TCGA-DJ-A3VF-01A	T3	N1	IV	Yes	No	292	0	10.8442
TCGA-BJ-A2NA-01A	T3	N0	III	Yes	Yes	577	0	10.289
TCGA-EL-A3CZ-01A	T1	N1	I	No	No	2418	0	3.18783
TCGA-EL-A3CW-01A	T2	N1	III	No	No	-	1	9.44558
TCGA-BJ-A0ZH-01A	T2	N1	IV	No	No	460	0	9.76535
TCGA-EM-A22Q-01A	T3	N0	I	No	No	433	0	3.54227
TCGA-BJ-A2N9-01A	T2	N0	I	No	No	623	0	3.8027
TCGA-DE-A0Y2-01A	T2	N1	I	No	Yes	658	0	11.4181
TCGA-DJ-A3V9-01A	T2	N1	IV	No	No	623	0	9.28814
TCGA-BJ-A18Z-01A	T3	N1	IV	Yes	No	1263	0	10.5478
TCGA-EM-A2OV-01A	T2	N0	II	No	Yes	674	0	3.2112
TCGA-EM-A3O8-01A	T1	N0	I	No	No	381	0	3.4219
TCGA-E8-A432-01A	T2	N0	II	No	No	931	0	8.13112
TCGA-E8-A436-01A	T2	N1	IV	No	No	455	0	10.6936
TCGA-BJ-A45D-01A	T2	N0	I	No	No	331	0	4.09468
TCGA-EM-A2P1-01A	T2	N1	I	No	No	531	0	11.0003
TCGA-EL-A3H4-01A	T4	N1	IV	Yes	No	1512	0	10.289
TCGA-EL-A3T1-01A	T2	N0	I	Yes	No	3941	0	10.395
TCGA-KS-A41J-01A	T2	N1	I	No	No	477	0	8.93239
TCGA-E8-A419-01A	T2	N1	I	No	No	774	0	10.395
TCGA-FY-A3NM-01A	T3	N0	III	Yes	Yes	885	0	3.05063
TCGA-FY-A4B0-01A	T1	-	I	No	No	420	0	6.53748
TCGA-DE-A2OL-01A	T2	-	I	No	No	1145	0	5.52204
TCGA-DJ-A13T-01A	T2	N0	I	No	No	1709	0	9.23729
TCGA-E8-A434-01A	T1	N0	I	No	No	953	0	9.05959
TCGA-DE-A0XZ-01A	T1	N1	III	No	No	1090	0	9.61201
TCGA-FY-A3RA-01A	T2	-	I	No	No	550	0	11.4181
TCGA-DE-A4MC-01A	T3	N1	I	Yes	Yes	913	0	10.6936
TCGA-DO-A2HM-01B	T1	N1	IV	No	No	71	0	10.5478
TCGA-E8-A433-01A	T2	N0	I	No	No	951	0	8.25301
TCGA-ET-A25R-01A	T3	-	III	Yes	No	1930	0	10.8442
TCGA-BJ-A3PR-01A	T1	N0	I	No	No	1107	0	9.16762
TCGA-FY-A40N-01A	T1	N0	I	No	No	579	0	4.39934
TCGA-EL-A3CT-01A	T4	N1	IV	Yes	No	-	1	12.601
TCGA-J8-A4HW-01A	T2	N1	III	No	No	79	0	8.73612
TCGA-BJ-A0ZB-01A	T3	N1	IV	Yes	No	122	0	9.76535
TCGA-ET-A39N-01A	T3	-	I	No	Yes	3751	0	4.63047
TCGA-DJ-A3US-01A	T1	N0	I	No	No	998	0	6.46609
TCGA-IM-A4EB-01A	T3	N1	I	Yes	No	780	0	9.36115
TCGA-EL-A3GS-01A	T3	N1	I	Yes	No	1989	0	9.76535
TCGA-DJ-A3V5-01A	T3	N0	III	Yes	No	584	0	9.88789
TCGA-CE-A3ME-01A	T2	N0	II	No	No	379	0	10.5478
TCGA-DE-A69J-01A	T2	-	I	No	No	447	0	11.9115
TCGA-L6-A4ET-01A	T3	-	IV	No	No	664	0	7.30267
TCGA-J8-A3YH-01A	T3	N1	I	No	No	175	0	8.41012
TCGA-EM-A2CP-01A	T2	N0	I	No	No	91	0	6.35577
TCGA-EL-A3ZH-01A	T3	N1	I	Yes	No	2773	0	3.38465
TCGA-EL-A3GY-01A	T1	N1	II	No	No	3076	0	12.0396
TCGA-DJ-A2Q4-01A	T1	N1	III	No	Yes	1032	0	10.0976
TCGA-ET-A39S-01A	T1	N0	I	No	Yes	1676	0	9.61201
TCGA-EM-A4FF-01A	T1	N1	I	No	Yes	2573	0	9.19902
TCGA-EL-A3GZ-01A	T1	N0	I	No	No	4258	0	9.56783
TCGA-DJ-A13U-01A	T3	N0	III	Yes	No	1590	0	8.75895
TCGA-FK-A3SE-01A	T2	N1	I	No	No	670	0	8.54786
TCGA-BJ-A28V-01A	T3	N0	III	-	No	987	0	3.73237
TCGA-DJ-A3VL-01A	T1	N0	I	No	Yes	713	0	3.47364
TCGA-DJ-A3V4-01A	T3	N1	III	Yes	No	1294	0	9.52395
TCGA-EM-A4FK-01A	T2	-	I	No	No	649	0	4.94397
TCGA-EL-A3CP-01A	T1	-	-	No	No	4831	0	9.13601
TCGA-ET-A3BX-01A	T3	N1	I	Yes	No	1596	0	11.9115
TCGA-E8-A2EA-01A	T1	N0	I	No	No	1085	0	9.08561
TCGA-E8-A416-01A	T1	N0	I	No	No	952	0	6.68237
TCGA-EL-A3GU-01A	T3	N1	III	Yes	Yes	4137	0	10.5478
TCGA-EM-A1YE-01A	T2	N0	II	No	Yes	1645	0	2.78268
TCGA-ET-A3DV-01A	T3	N0	II	Yes	No	5068	0	4.17598
TCGA-DJ-A2PP-01A	T2	N0	II	No	No	930	0	4.52449
TCGA-EM-A2OY-01A	T2	N0	II	No	No	983	0	3.14994
TCGA-EM-A3AN-01A	T1	N1	I	No	Yes	1006	0	8.63154
TCGA-BJ-A28R-01A	T1	N0	I	-	No	1282	0	9.61201
TCGA-BJ-A2N7-01A	T3	N0	I	Yes	No	559	0	6.27043
TCGA-EL-A4K1-01A	T3	N1	III	No	No	1046	0	9.65847
TCGA-BJ-A3F0-01A	T1	N0	I	No	No	424	0	4.47325
TCGA-BJ-A18Y-01A	T1	N0	I	No	No	1563	0	4.53906
TCGA-KS-A4IC-01A	T1	N1	III	No	No	1073	0	9.36115
TCGA-ET-A3BW-01A	T2	-	I	No	Yes	1419	0	7.15381
TCGA-FE-A22Z-01A	T4	N1	IV	Yes	No	2243	0	10.5478
TCGA-EL-A3ZO-01A	T3	N1	III	Yes	No	2211	0	11.0003
TCGA-DJ-A13O-01A	T1	N0	I	No	No	1161	0	9.44558
TCGA-EM-A4FH-01A	T3	-	III	No	No	892	0	2.76365
TCGA-IM-A3ED-01A	T1	N0	I	No	No	1442	0	10.1838
TCGA-EM-A3AQ-01A	T1	N0	I	No	No	904	0	7.02846
TCGA-DJ-A3UU-01A	T3	N0	III	Yes	No	713	0	9.13601
TCGA-H2-A3RH-01A	T1	N0	I	No	Yes	379	0	4.16978
TCGA-DJ-A1QN-01A	T1	N0	I	No	Yes	1295	0	11.4181
TCGA-ET-A39K-01A	T3	N1	III	Yes	No	3267	0	8.75895
TCGA-ET-A3DU-01A	T1	N1	I	No	No	1911	0	9.95137
TCGA-EM-A1YC-01A	T3	N0	III	No	Yes	2391	0	5.05799
TCGA-BJ-A45I-01A	T3	N0	III	Yes	Yes	470	0	10.395
TCGA-EL-A3TB-01A	T3	N1	III	Yes	No	2519	0	7.09431
TCGA-ET-A25P-01A	T1	N0	I	No	No	559	0	7.88286
TCGA-E8-A438-01A	T1	N0	I	No	No	1019	0	6.34352
TCGA-EL-A4K7-01A	T2	N1	III	Yes	No	1251	0	9.05959
TCGA-FY-A4B4-01A	T1	N1	III	No	No	657	0	10.5478
TCGA-MK-A84Z-01A	T3	-	III	-	No	728	0	4.14879
TCGA-ET-A39J-01A	T2	-	I	No	No	3227	0	10.395
TCGA-EM-A22J-01A	T2	N0	II	No	No	441	0	3.49249
TCGA-ET-A3BU-01A	T1	N1	I	No	Yes	2367	0	9.44558
TCGA-EM-A3OA-01A	T2	N0	II	No	No	822	0	2.98228
TCGA-EL-A3GR-01A	T3	-	I	Yes	No	3501	0	10.289
TCGA-EL-A4JW-01A	T1	N0	I	No	No	1056	0	10.289
TCGA-EL-A4KH-01A	T2	N0	I	No	No	823	0	7.22754
TCGA-ET-A3BQ-01B	T2	N0	I	No	No	2331	0	9.32365
TCGA-EL-A3CU-01A	T1	N1	III	No	No	4780	0	11.4181
TCGA-EM-A2CO-01A	T2	-	II	No	Yes	184	0	4.58582
TCGA-J8-A3O2-01A	T3	N1	I	Yes	No	342	0	9.16762
TCGA-EM-A1CV-01A	T1	N0	I	No	No	1475	0	9.16762
TCGA-EL-A4KD-01A	T3	N1	I	Yes	No	1326	0	7.91805
TCGA-EL-A3GX-01A	T2	N1	I	No	Yes	4494	0	11.1414
TCGA-KS-A41F-01A	T2	N1	I	No	No	4367	0	6.84369
TCGA-BJ-A0Z5-01A	T3	N1	III	-	No	448	0	8.4352
TCGA-ET-A25L-01A	T3	N1	IV	Yes	No	1721	0	10.5478
TCGA-DJ-A1QD-01A	T2	N1	I	No	No	1462	0	11.0003
TCGA-EM-A3SZ-01A	T2	N0	I	No	No	389	0	10.5478
TCGA-EL-A3ZR-01A	T2	N0	II	No	No	1830	0	2.575
TCGA-EM-A3FM-01A	T2	N1	IV	No	No	639	0	10.289
TCGA-EL-A3MW-01A	T2	N0	II	No	No	3305	0	8.54786
TCGA-DJ-A3UZ-01A	T3	N0	III	Yes	No	1246	0	4.94294
TCGA-BJ-A28S-01A	T2	N0	II	-	No	640	0	4.32647
TCGA-DJ-A2PO-01A	T1	N0	I	No	No	243	0	8.73612
TCGA-EL-A3T0-01A	T3	N1	III	Yes	No	4335	0	6.71451
TCGA-EL-A3GQ-01A	T1	N0	I	No	No	1528	0	9.95137
TCGA-DJ-A1QH-01A	T3	N1	III	Yes	No	1293	0	13.1428
TCGA-ET-A2N5-01A	T3	-	III	Yes	Yes	2460	0	2.63457
TCGA-ET-A40Q-01A	T3	N1	I	Yes	Yes	1407	0	9.88789
TCGA-EM-A1CW-01A	T3	N0	I	No	No	549	0	3.51952
TCGA-FY-A40K-01A	T1	N0	I	No	No	461	0	8.73612
TCGA-FY-A3BL-01A	T1	-	I	No	No	621	0	9.56783
TCGA-EM-A2CR-01A	T2	N0	II	No	No	415	0	4.32953
TCGA-H2-A26U-01A	T3	N0	III	Yes	No	517	0	11.6829
TCGA-EM-A2P3-01A	T1	-	I	No	No	444	0	10.395
TCGA-MK-A4N7-01A	T2	N0	I	No	No	987	0	11.9115
TCGA-EM-A3FO-01A	T3	N0	I	No	No	532	0	8.4352
TCGA-DJ-A2PT-01A	T3	N0	III	Yes	No	1181	0	10.5478
TCGA-ET-A40P-01A	T2	N0	I	No	No	1338	0	4.49818
TCGA-EL-A3N2-01A	T2	N1	I	Yes	No	902	0	10.5478
TCGA-EM-A3AR-01A	T1	N1	I	No	No	1133	0	7.10978
TCGA-ET-A3DP-01A	T2	-	I	No	No	2877	0	9.52395
TCGA-DJ-A1QF-01A	T2	N0	II	No	No	931	0	9.88789
TCGA-EM-A3FR-01A	T2	N1	III	No	No	457	0	2.87424
TCGA-EM-A3O6-01A	T2	-	II	No	No	458	0	3.69953
TCGA-FY-A3YR-01A	T3	N1	III	Yes	No	528	0	10.5478
TCGA-DJ-A3UQ-01A	T3	N1	III	Yes	No	595	0	11.4181
TCGA-DJ-A4V5-01A	T3	N1	IV	Yes	No	1076	0	10.395
TCGA-EM-A2CU-01A	T2	N1	III	No	No	400	0	7.98171
TCGA-DJ-A3VI-01A	T1	N1	III	No	No	95	0	9.95137
TCGA-EL-A3CN-01A	T3	N0	II	Yes	No	4731	0	10.8442
TCGA-DJ-A3V6-01A	T3	N0	III	Yes	No	818	0	10.395
TCGA-J8-A42S-01A	T1	N1	III	No	No	75	0	8.48923
TCGA-FE-A3PC-01A	T3	N1	I	No	No	2606	0	8.96142
TCGA-FE-A239-01A	T3	N0	III	No	No		1	4.29711
TCGA-MK-A4N9-01A	T3	N1	I	Yes	No	919	0	9.44558
TCGA-BJ-A45J-01A	T1	N1	I	-	No	658	0	9.88789
TCGA-ET-A25N-01A	T2	N1	I	No	No	1928	0	8.99039
TCGA-ET-A39R-01A	T1	N0	I	No	No	2863	0	8.73612
TCGA-BJ-A291-01A	T1	N0	I	-	No	696	0	3.96498
TCGA-FE-A238-01A	T3	N0	I	Yes	No	1215	0	11.0003
TCGA-CE-A483-01A	T2	N1	I	No	No	457	0	9.48531
TCGA-ET-A25G-01A	T3	N0	III	Yes	No	2492	0	11.1414
TCGA-EL-A3H5-01A	T4	N1	IV	Yes	No	2542	0	10.395
TCGA-DJ-A3V3-01A	T2	N0	II	No	No	931	0	7.83146
TCGA-EL-A4K0-01A	T1	N0	I	No	No	944	0	10.1838
TCGA-H2-A422-01A	T2	N0	I	No	No	566	0	9.88789
TCGA-EM-A3AK-01A	T1	N0	I	No	No	477	0	9.28814
TCGA-J8-A3NZ-01A	T3	N1	III	Yes	No	524	0	10.5478
TCGA-GE-A2C6-01A	T2	N1	I	No	No	381	0	9.76535
TCGA-EM-A22N-01A	T1	N0	I	No	No	324	0	3.45474
TCGA-DJ-A1QM-01A	T1	N0	I	No	Yes	183	0	10.395
TCGA-DJ-A3VK-01A	T3	N0	III	Yes	No	753	0	4.26888
TCGA-L6-A4EP-01A	T2	N0	I	No	No	1016	0	8.2326
TCGA-DJ-A4V4-01A	T1	N0	I	No	No	481	0	9.23729
TCGA-EL-A4KI-01A	T3	N0	III	Yes	No	727	0	5.19369
TCGA-IM-A3EB-01A	T3	N1	I	Yes	No	1488	0	10.5478
TCGA-DJ-A2QB-01A	T3	N1	IV	Yes	Yes	1070	0	4.68805
TCGA-DE-A4MB-01A	T3	N1	IV	Yes	No	352	0	11.4181
TCGA-EM-A2OW-01A	T1	-	I	No	No	1227	0	4.40201
TCGA-ET-A3DO-01A	T2	-	I	No	No	3552	0	10.289
TCGA-BJ-A45K-01A	T2	N0	I	No	No	705	0	4.19155
TCGA-EM-A3FJ-01A	T1	N1	I	No	No	850	0	9.52395
TCGA-J8-A3YD-01A	T1	N1	III	No	No	968	0	9.8198
TCGA-FE-A237-01A	T3	N1	I	Yes	No	3431	0	11.0003
TCGA-EM-A3AO-01A	T2	N1	IV	No	No	1354	0	7.43657
TCGA-DE-A7U5-01A	T2	N0	I	-	No	84	0	11.1414
TCGA-ET-A25O-01A	T2	N1	I	No	No	1986	0	9.23729
TCGA-E8-A415-01A	T1	N1	I	No	No	944	0	10.1838
TCGA-EL-A3ZG-01A	T3	N0	I	Yes	No	2724	0	7.38212
TCGA-EM-A4FQ-01A	T2	N1	I	No	No	683	0	9.8198
TCGA-ET-A3BO-01A	T3	N1	I	Yes	No	1533	0	9.76535
TCGA-DJ-A4V2-01A	T2	N0	I	No	No	95	0	10.5478
TCGA-DJ-A2QA-01A	T3	N0	III	Yes	No	1020	0	6.43767
TCGA-FY-A3TY-01A	T3	N0	III	Yes	No	709	0	10.289
TCGA-DJ-A1QQ-01A	T3	N0	I	Yes	No	534	0	9.61201
TCGA-EL-A3ZN-01A	T3	N1	I	Yes	No	1614	0	7.67243
TCGA-J8-A3YF-01A	T1	N1	III	No	No	751	0	9.8198
TCGA-EM-A2OZ-01A	T1	N0	I	No	Yes	1033	0	9.23729
TCGA-DJ-A2PZ-01A	T3	N0	III	Yes	No	256	0	9.70824
TCGA-E3-A3DY-01A	T3	N1	I	No	No	2815	0	10.1838
TCGA-J8-A3O0-01A	T2	N0	I	No	No	1313	0	6.05142
TCGA-FY-A3R8-01A	T3	-	III	Yes	No	477	0	10.1838
TCGA-EL-A3GV-01A	T3	N0	III	Yes	No	1532	0	10.289
TCGA-EL-A3MY-01A	T4		IV	Yes	No	-	1	11.0003
TCGA-FE-A235-01A	T2	N1	I	No	No	3571	0	7.76522
TCGA-DJ-A13S-01A	T1	N0	I	No	No	265	0	3.62751
TCGA-E8-A44M-01A	T1	N0	I	No	No	917	0	7.375
TCGA-EL-A4KG-01A	T3	N0	I	Yes	No	739	0	10.289
TCGA-FY-A3NP-01A	T1	N0	I	No	No	491	0	3.57991
TCGA-FK-A3SH-01A	T2	N1	III	No	No	1463	0	7.1714
TCGA-EM-A3OB-01A	T2	N0	I	No	No	1176	0	2.60556
TCGA-DO-A1JZ-01A	T2	-	I	No	No	1670	0	9.23729
TCGA-DJ-A3VB-01A	T3	N1	III	Yes	No	697	0	10.1838
TCGA-ET-A39T-01A	T3	N0	III	Yes	Yes	2987	0	9.36115
TCGA-DJ-A3UT-01A	T1	N0	I	No	No	1105	0	2.87393
TCGA-EM-A2P0-01A	T2	N1	I	No	No	535	0	9.08561
TCGA-EL-A3H8-01A	T3	N1	I	Yes	No	4577	0	11.1414
TCGA-EL-A3CM-01A	T3	N1	III	Yes	No	-	1	10.6936
TCGA-DJ-A2Q6-01A	T1	N1	I	Yes	No	1109	0	9.88789
TCGA-EM-A3ST-01A	T3	N0	III	No	No	1182	0	3.44587
TCGA-IM-A420-01A	T2	N1	I	No	No	250	0	9.48531
TCGA-BJ-A2P4-01A	T2	N0	I	-	No	390	0	4.40338
TCGA-EM-A2CL-01A	T2	-	I	No	Yes	401	0	3.85485
TCGA-ET-A2N3-01B	T2	-	I	No	No	2535	0	2.40416
TCGA-MK-A4N6-01A	T3	N1	I	-	No	1098	0	11.9115
TCGA-EM-A3O3-01A	T2	N1	III	No	No	441	0	10.289
TCGA-DJ-A3VD-01A	T1	N1	I	No	No	1238	0	12.0396
TCGA-ET-A3DW-01A	T2	N1	III	No	No	752	0	9.95137
TCGA-DJ-A2PX-01A	T1	N0	I	No	No	881	0	7.01333
TCGA-DJ-A2PN-01A	T1	N0	I	No	No	307	0	9.70824
TCGA-ET-A39O-01A	T1	N0	I	No	Yes	3059	0	11.6829
TCGA-H2-A421-01A	T1	N1	I	No	No	610	0	9.88789
TCGA-EM-A4FV-01A	T1	N0	I	No	No	744	0	8.57646
TCGA-EM-A2CT-01A	T1	N0	I	No	No	1474	0	4.1198
TCGA-EM-A3AL-01A	T1	N0	I	No	No	430	0	4.10061
TCGA-EL-A4K2-01A	T1	N0	I	No	No	928	0	5.58524
TCGA-EM-A3AJ-01A	T3	N1	I	No	No	941	0	4.91881
TCGA-DJ-A3UP-01A	T2	N0	I	No	No	499	0	4.70609
TCGA-FY-A3R6-01A	T2	N1	IV	No	No	423	0	8.2882
TCGA-CE-A485-01A	T2	N1	I	No	No	385	0	9.8198
TCGA-FY-A3R9-01A	T1	N0	I	No	No	504	0	2.42968
TCGA-ET-A3BT-01A	T2	N1	IV	No	No	2665	0	11.0003
TCGA-KS-A4ID-01A	T1	N0	I	No	No	1011	0	7.61152
TCGA-ET-A4KN-01A	T3	N0	III	Yes	No	1009	0	7.40475
TCGA-EM-A3SY-01A	T1	-	I	No	No	411	0	7.73209
TCGA-ET-A25M-01A	T2	N1	I	No	No	1831	0	10.289
TCGA-E8-A242-01A	T3	N0	III	Yes	Yes	950	0	10.6936
TCGA-KS-A4I7-01A	T1	N0	I	No	No	987	0	9.05959
TCGA-FY-A3I5-01B	T3	N0	III	No	No	238	0	4.92677
TCGA-ET-A40R-01A	T2	N1	I	No	No	1350	0	7.12606
TCGA-EL-A3ZT-01A	T3	N0	I	Yes	No	1808	0	9.56783
TCGA-EM-A2CM-01A	T3	N0	III	No	No	1253	0	5.20803
TCGA-DJ-A2PV-01A	T2	N0	II	No	Yes	973	0	9.88789
TCGA-DJ-A3VG-01A	T1	N0	I	No	No	1085	0	3.80916
TCGA-BJ-A0ZJ-01A	T2	N1	I	No	No	1280	0	6.76891
TCGA-EM-A3SU-01A	T2	N1	I	No	No	911	0	9.44558
TCGA-E3-A3E0-01A	T2	N0	I	No	No	2019	0	7.26528
TCGA-EL-A3GP-01A	T3	N1	III	Yes	No	1506	0	10.1838
TCGA-H2-A3RI-01A	T3	N0	I	Yes	No	335	0	8.80067
TCGA-ET-A2N0-01A	T1	N1	III	No	No	1600	0	7.39643
TCGA-DJ-A13X-01A	T3	N0	III	No	No	253	0	10.8442
TCGA-DJ-A3UX-01A	T1	N0	I	No	No	345	0	8.00432
TCGA-FY-A3WA-01A	T1	-	I	No	No	519	0	3.93459
TCGA-DJ-A2PR-01A	T3	N1	I	Yes	No	835	0	9.88789
TCGA-EM-A3FQ-01A	T3	N1	I	No	Yes	492	0	9.76535
TCGA-FY-A40L-01A	T4	N1	IV	Yes	No	726	0	10.6936
TCGA-DE-A3KN-01A	T3	N1	IV	Yes	No	831	0	6.91946
TCGA-EM-A2P2-01A	T3	N0	III	No	No	526	0	5.98283
TCGA-E3-A3E1-01A	T1	N0	I	No	No	2449	0	9.70824
TCGA-BJ-A45F-01A	T1	N0	I	-	No	105	0	4.05861
TCGA-FY-A3I4-01A	T2	N0	I	No	No	542	0	8.99039
TCGA-EM-A22K-01A	T1	N1	IV	No	No	479	0	3.09125
TCGA-BJ-A45G-01A	T2	N1	III	No	No	725	0	4.14106
TCGA-CE-A27D-01A	T2	N1	I	No	No	374	0	7.375
TCGA-EM-A3FL-01A	T1	-	I	No	No	1441	0	3.21053
TCGA-DJ-A1QG-01A	T1	N0	I	No	Yes	1368	0	4.1198
TCGA-EM-A1YD-01A	T2	N0	II	No	Yes	1734	0	5.19604
TCGA-DE-A69K-01A	T3	N0	III	Yes	No	434	0	9.44558
TCGA-J8-A4HY-01A	T4	N1	IV	Yes	No	6	0	8.8238
TCGA-EL-A3D1-01A	T2	N0	I	No	No	2997	0	8.30493
TCGA-BJ-A4O9-01A	T2	N0	II	No	No	714	0	8.45988
TCGA-BJ-A4O8-01A	T3	N1	III	No	No	591	0	10.395
TCGA-KS-A4I3-01A	T3	N1	I	Yes	No	1329	0	9.76535
TCGA-E8-A414-01A	T3	N0	III	No	No	958	0	11.1414
TCGA-L6-A4EU-01A	T3	N1	III	Yes	No	289	0	9.44558
TCGA-EM-A4FM-01A	T3	N1	IV	Yes	No	162	0	9.88789
TCGA-ET-A2MX-01A	T2	N1	I	No	No	2689	0	8.07719
TCGA-EL-A3CR-01A	T3	N1	III	Yes	No		1	9.48531
TCGA-DJ-A2PU-01A	T2	N0	II	No	No	1033	0	9.8198
TCGA-E3-A3E3-01A	T2	N0	II	No	Yes	1595	0	9.65847
TCGA-EL-A3N3-01A	T3	-	II	Yes	No	5423	0	10.6936
TCGA-EM-A3FK-01A	T1	N1	I	No	No	723	0	11.5524
TCGA-EM-A3FP-01A	T2	N0	II	No	No	529	0	3.74353
TCGA-DJ-A3VM-01A	T2	N0	II	No	No	840	0	4.83369
TCGA-DJ-A13L-01A	T1	N0	I	No	No	303	0	10.0976
TCGA-ET-A2MZ-01A	T1	N0	I	No	No	1133	0	9.56783
TCGA-BJ-A0Z9-01A	T3	N0	III	Yes	No	1257	0	11.0003
TCGA-FY-A40M-01A	T1	N0	I	No	No	684	0	5.09543
TCGA-DJ-A3VJ-01A	T3	N1	I	Yes	No	1108	0	9.02682
TCGA-EL-A3D4-01A	T3	N1	IV	Yes	No	2116	0	6.23452
TCGA-DJ-A3UY-01A	T1	N0	I	No	No	1091	0	9.88789
TCGA-BJ-A0ZC-01A	T1	N0	I	No	No	352	0	4.44718
TCGA-FK-A3SB-01A	T3	N1	I	Yes	No	125	0	9.36115
TCGA-ET-A3BN-01A	T2	-	I	No	No	859	0	9.19902
TCGA-DJ-A2PW-01A	T3	N1	III	No	No	1060	0	9.88789
TCGA-DJ-A2Q3-01A	T3	N1	III	Yes	No	1224	0	10.5478
TCGA-DJ-A2Q7-01A	T2	N1	III	Yes	No	1068	0	8.75895
TCGA-EL-A4K4-01A	T3	N1	I	Yes	No	1623	0	11.4181
TCGA-ET-A40S-01A	T2	N0	II	No	No	1223	0	6.50751
TCGA-DJ-A2PY-01A	T3	N1	III	Yes	Yes	267	0	11.4181
TCGA-CE-A3MD-01A	T2	N1	I	No	Yes	389	0	7.23995
TCGA-DJ-A3UN-01A	T1	N0	I	No	No	986	0	8.70589
TCGA-EM-A2CQ-01A	T1	N1	I	No	Yes	374	0	6.27043
TCGA-BJ-A45H-01A	T3	N0	III	Yes	No	865	0	7.88286
TCGA-EL-A4JZ-01A	T3	N1	III	Yes	No	1856	0	9.23729
TCGA-IM-A41Z-01A	T1	N0	I	No	No	946	0	4.20046
TCGA-EL-A3T3-01A	T2	N0	II	No	No	4017	0	9.56783
TCGA-DE-A4M8-01A	T2	N1	III	No	No	564	0	7.25873
TCGA-DJ-A2PQ-01A	T2	N1	I	No	No	1077	0	8.21363
TCGA-DJ-A3UO-01A	T3	N1	IV	Yes	No	957	0	10.5478
TCGA-EL-A3D6-01A	T3	N1	III	Yes	No	3296	0	10.6936
TCGA-FE-A234-01A	T2	N1	I	No	No	2075	0	11.5524
TCGA-DJ-A2Q5-01A	T2	N1	IV	No	No	1140	0	10.0976
TCGA-EM-A22L-01A	T2	N0	I	No	No	318	0	3.49874
TCGA-E3-A3E5-01A	T4	N1	IV	No	No	1215	0	8.96142
TCGA-BJ-A0ZE-01A	T3	N0	III	Yes	No	509	0	2.81803
TCGA-FY-A2QD-01A	T1	N0	-	No	No	38	0	2.82783
TCGA-CE-A13K-01A	T3	N1	I	Yes	Yes	385	0	7.74267
TCGA-QD-A8IV-01A	T3	N1	IV	Yes	No	392	0	4.14716
TCGA-4C-A93U-01A	T4	N1	IV	Yes	No	129	0	12.0396
TCGA-FK-A4UB-01A	T3	N1	III	Yes	No	3531	0	5.77428
TCGA-EM-A22O-01A	T4	N1	IV	Yes	No	1344	0	11.0003
TCGA-EL-A3ZM-01A	T4	N1	IV	Yes	No	1096	0	9.88789
TCGA-DE-A4M9-01A	T2	-	I	No	No	573	0	5.8632
TCGA-ET-A39L-01A	T3	N0	I	No	No	3299	0	4.4
TCGA-BJ-A0Z3-01A	T1	N0	I	No	No	497	0	9.36115
TCGA-ET-A4KQ-01A	T2	-	II	No	No	955	0	3.84469
TCGA-DO-A1K0-01A	T3	N1	I	Yes	No	655	0	10.6936
TCGA-EL-A3H1-01A	T1	N0	I	No	No	-	1	4.5667
TCGA-ET-A25K-01A	T2	N1	I	No	No	2142	0	9.56783
TCGA-EM-A2CJ-01A	T1	-	I	No	No	1447	0	4.21864
TCGA-EL-A3CL-01A	T2	-	II	No	No	-	1	9.8198
TCGA-EL-A3T9-01A	T4	N1	IV	Yes	No	-	1	12.0396
TCGA-EM-A3FN-01A	T3	N0	I	No	No	367	0	3.10326
TCGA-FE-A232-01A	T3	-	I	Yes	No	2424	0	10.1838
TCGA-E8-A3X7-01A	T4	N0	IV	Yes	Yes	951	0	8.96142
TCGA-BJ-A28Z-01A	T3	N1	III	Yes	No	337	0	9.76535
TCGA-EM-A3AP-01A	T2	-	I	No	No	254	0	4.93373
TCGA-DJ-A4UQ-01A	T3	N1	IV	Yes	No	1005	0	8.90523
TCGA-DE-A4MA-01A	T3	N1	III	Yes	No	916	0	8.99039
TCGA-EL-A3T8-01A	T2	N0	I	No	No	3269	0	9.76535
TCGA-FE-A231-01A	T3	N1	IV	No	No	961	0	11.9115
TCGA-EL-A3ZQ-01A	T2	N0	II	No	No	1862	0	7.26528
TCGA-KS-A4IB-01A	T2	N1	I	No	No	2577	0	9.05959
TCGA-FE-A3PA-01A	T4	N0	II	Yes	No	3235	0	6.69866
TCGA-EL-A3ZL-01A	T1	N1	I	No	No	1895	0	7.90772
TCGA-EM-A4G1-01A	T1	N0	I	No	No	416	0	4.96168
TCGA-EM-A2CS-01A	T3	N1	IV	No	No	841	0	10.289
TCGA-DJ-A13P-01A	T2	N0	II	Yes	No	5150	0	7.70232
TCGA-EM-A2CN-01A	T3	N0	IV	No	Yes	715	0	3.97953
TCGA-DJ-A4UT-01A	T1	N0	I	No	No	823	0	9.65847
TCGA-EL-A3ZK-01A	T2	N1	I	No	No	1575	0	10.0976
TCGA-BJ-A0Z0-01A	T2	N0	II	No	No	419	0	2.69003
TCGA-ET-A2N4-01A	T3	N0	III	Yes	No	81	0	8.67715
TCGA-BJ-A191-01A	T1	N0	I	No	No	147	0	5.88492
TCGA-EM-A1CS-01A	T1	N0	I	No	No	817	0	9.70824
TCGA-E8-A2JQ-01A	T3	N1	I	Yes	No	356	0	9.76535
TCGA-DJ-A13V-01A	T3	N1	I	Yes	No	1313	0	9.65847
TCGA-EL-A3MX-01A	T4	N1	IV	No	Yes	-	1	7.47637
TCGA-CE-A484-01A	T2	N1	I	No	No	378	0	4.72437
TCGA-DJ-A13R-01A	T3	N0	III	No	No	565	0	4.30363
TCGA-H2-A2K9-01A	T2	N1	I	No	No	659	0	4.02006
TCGA-BJ-A0Z2-01A	T2	N0	IV	No	No	1514	0	4.00596
TCGA-DJ-A2Q1-01A	T1	N1	I	No	No	1148	0	10.289
TCGA-BJ-A0ZG-01A	T1	N0	I	No	Yes	775	0	3.99609
TCGA-E8-A437-01A	-	-	I	No	No	1213	0	7.90772
TCGA-FK-A3SD-01A	T1	N0	I	-	No	32	0	2.42875
TCGA-BJ-A3PT-01A	T3	N0	III	-	No	709	0	6.17407
TCGA-ET-A3BP-01A	T2	N1	I	No	No	2406	0	7.30267
TCGA-ET-A3BS-01A	T3	N1	I	Yes	No	176	0	9.8198
TCGA-EL-A3GW-01A	T2	N0	I	No	No	1527	0	4.18436
TCGA-DJ-A1QO-01A	T3	N0	III	Yes	No	1442	0	11.0003
TCGA-DJ-A1QI-01A	T2	N0	II	No	No	455	0	11.9115
TCGA-EL-A3MZ-01A	T4	N1	III	Yes	No	-	1	10.395
TCGA-BJ-A0ZA-01A	T2	N0	II	No	No	574	0	3.90661
TCGA-BJ-A45C-01A	T3	N0	III	Yes	No	175	1	2.63635
TCGA-EM-A2CK-01A	T2	N1	I	No	No	544	0	3.3402
TCGA-KS-A41L-01A	T2	N0	I	No	No	3463	0	2.38639
TCGA-ET-A3DR-01A	T1	N1	I	No	No	2451	0	8.4352
TCGA-ET-A3DQ-01A	T1	N0	I	No	No	2581	0	6.13523
TCGA-EL-A3H3-01A	T2	N1	I	No	No	1319	0	7.2525
TCGA-FY-A3W9-01A	T2	N0	II	No	No	658	0	4.50027
TCGA-KS-A4I5-01A	T1	N1	IV	No	No	567	0	8.03892
TCGA-DJ-A4UP-01A	T1	N1	I	No	No	916	0	7.35591
TCGA-EM-A4FO-01A	T1	N0	I	No	No	802	0	8.13112
TCGA-DJ-A3V0-01A	T4	N1	IV	Yes	No	1125	0	9.16762
TCGA-DJ-A2QC-01A	T2	N0	II	No	No	1215	0	7.27886
TCGA-BJ-A28X-01A	T3	N1	I	Yes	No	942	0	9.95137
TCGA-EM-A4FN-01A	T1	N1	IV	No	No	802	0	9.61201
TCGA-DJ-A3VA-01A	T1	N1	I	No	No	755	0	10.289
TCGA-EM-A1CT-01A	T1	N1	IV	No	No	553	0	9.65847
TCGA-EL-A3H7-01A	T3	N1	I	Yes	No	4228	0	10.6936
TCGA-FK-A3SG-01A	T2	N1	I	No	No	28	0	9.13601
TCGA-EL-A4JV-01A	T2	N0	I	No	No	1748	0	3.89668
TCGA-DE-A4MD-01A	T3	N1	IV	No	Yes	764	0	11.5524
TCGA-ET-A3DS-01A	T1	N0	I	No	No	2033	0	2.89044
TCGA-CE-A482-01A	T1	N1	I	No	No	325	0	9.65847
TCGA-FE-A236-01A	T2	N1	I	No	No	2031	0	11.0003
TCGA-EL-A3CO-01A	T3	N1	III	Yes	No	-	1	7.81946
TCGA-E8-A417-01A	T2	N1	I	No	No	938	0	9.56783
TCGA-EM-A2OX-01A	T1	N1	IV	No	No	600	0	9.28814
TCGA-EL-A4JX-01A	T3	N0	I	No	No	1398	0	10.5478
TCGA-KS-A41I-01A	T1	N0	I	No	No	486	0	5.63185
TCGA-BJ-A0YZ-01A	T2	N0	II	No	No	754	0	5.2973
TCGA-ET-A39I-01A	T1	-	I	No	Yes	9	1	3.03828
TCGA-DJ-A3V7-01A	T3	N0	III	Yes	No	706	0	10.0976
TCGA-EL-A3TA-01A	T2	N0	I	No	No	2035	0	7.00295
TCGA-ET-A2MY-01A	T1	-	I	No	No	1787	0	9.65847
TCGA-BJ-A45E-01A	T1	N0	I	-	No	639	0	6.59622
TCGA-ET-A25I-01A	T2	N0	I	No	No	2485	0	3.50756
TCGA-FY-A76V-01A	T2	-	II	No	No	51	0	7.78751
TCGA-BJ-A3EZ-01A	T3	N1	IV	Yes	No	487	0	10.0976
TCGA-DJ-A3UM-01A	T1	N0	I	No	No	944	0	10.0976
TCGA-DJ-A13W-01A	T1	N0	I	No	No	1593	0	1.91543
TCGA-DJ-A3UR-01A	T3	N1	III	Yes	No	1105	0	7.31427
TCGA-EM-A3O7-01A	T3	-	III	No	No	223	0	7.27886
TCGA-IM-A3U3-01A	T1	N0	I	No	No	514	0	9.76535
T, tumor; N, node; PFI, progression-free interval; OS, overall survival; FN1, fibronectin 1.
